# Supplementary material for: “Military Parade Blue Skies” in Beijing: Decisive Influence of Meteorological Factors on Transport Channel and Atmospheric Pollutant Concentration Level
Source: MDPI journal article supplement (doi:10.3390/atmos12050636), 2021-05-17
Supplement: s1 [file s1]

Archive with 2 entries (2 files):
- atmosphere-1145979-supplementary/Figures-supplementary.pdf
- atmosphere-1145979-supplementary/Tables.pdf
