# Supplementary material for: “Military Parade Blue Skies” in Beijing: Decisive Influence of Meteorological Factors on Transport Channel and Atmospheric Pollutant Concentration Level
Source: MDPI journal article supplement (doi:10.3390/atmos12050636), 2021-05-17
Supplement: s1 [file s1 › atmosphere-1145979-supplementary/Figures-supplementary.pdf]

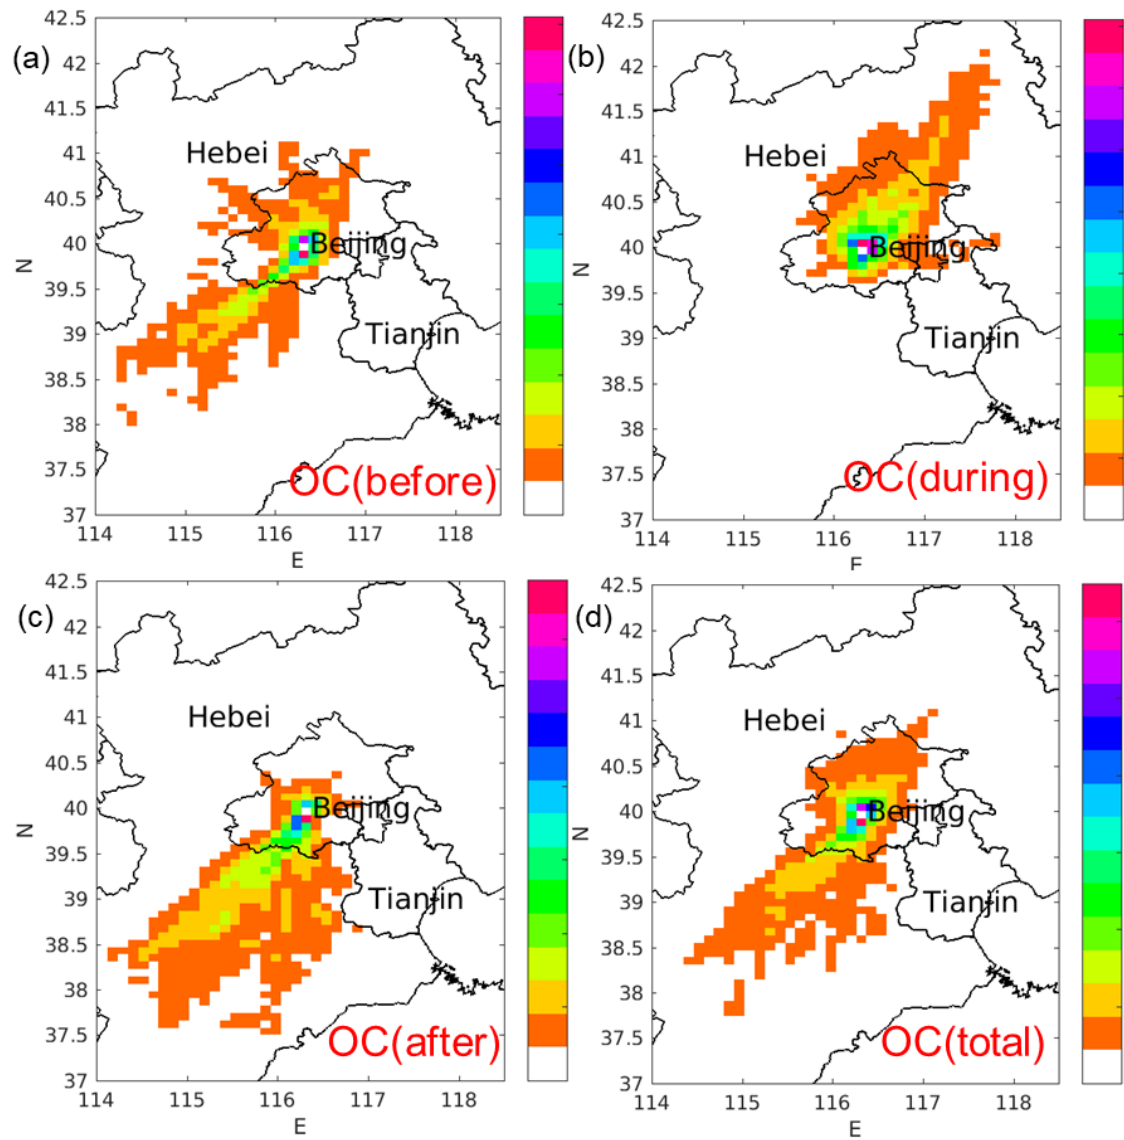

**S1.** CFA results of OC in four time periods. Suplots a, b, c and d are for before, during, after and the total observation periods.

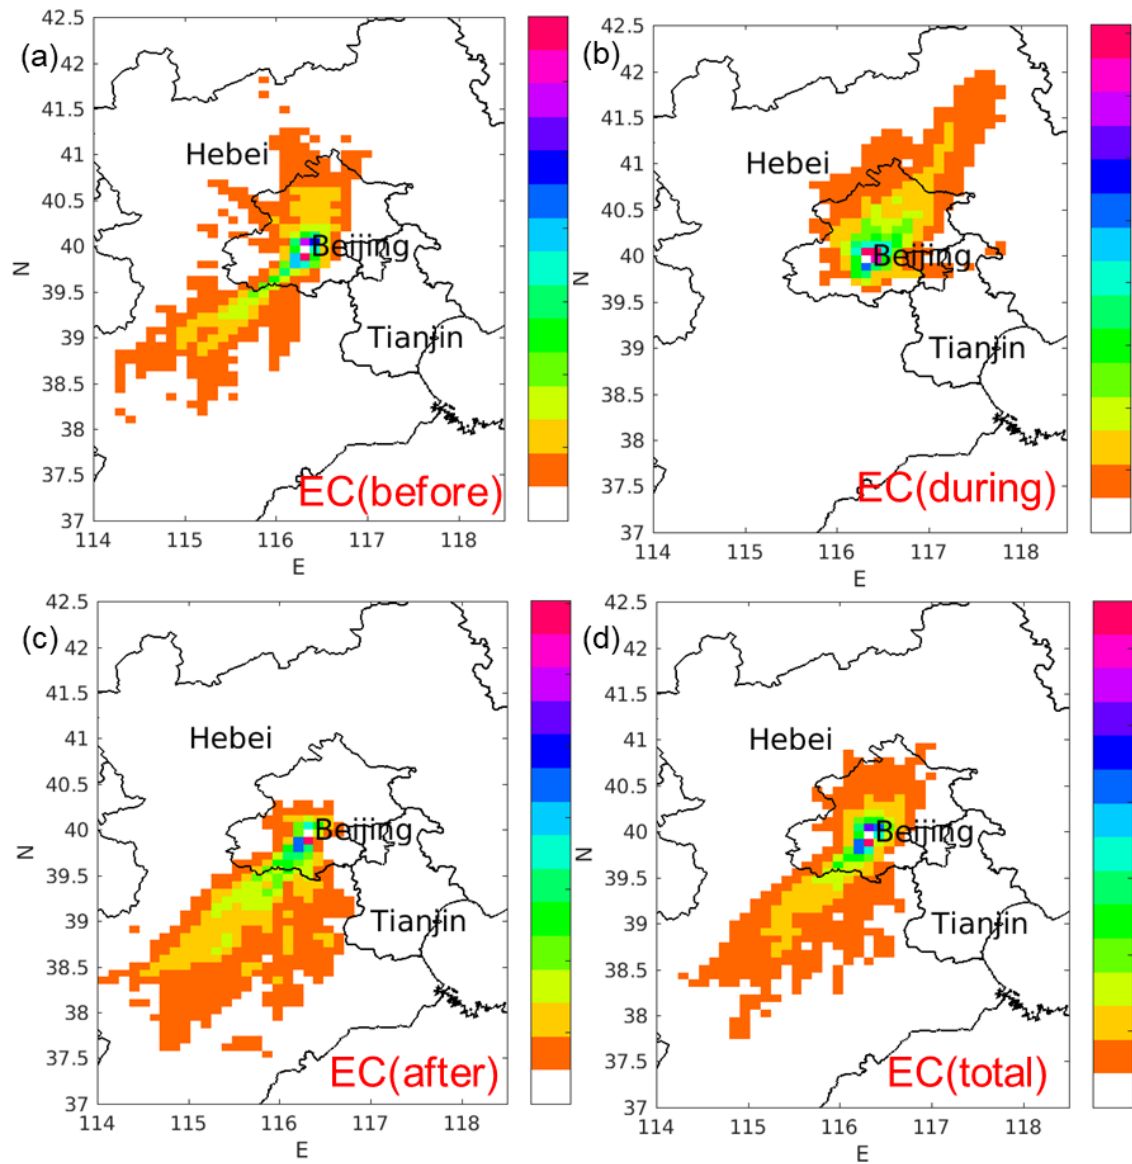

S2. CFA results of EC in four time periods. Suplots a, b, c and d are for before, during, after and the total observation periods.

S3. Part 1

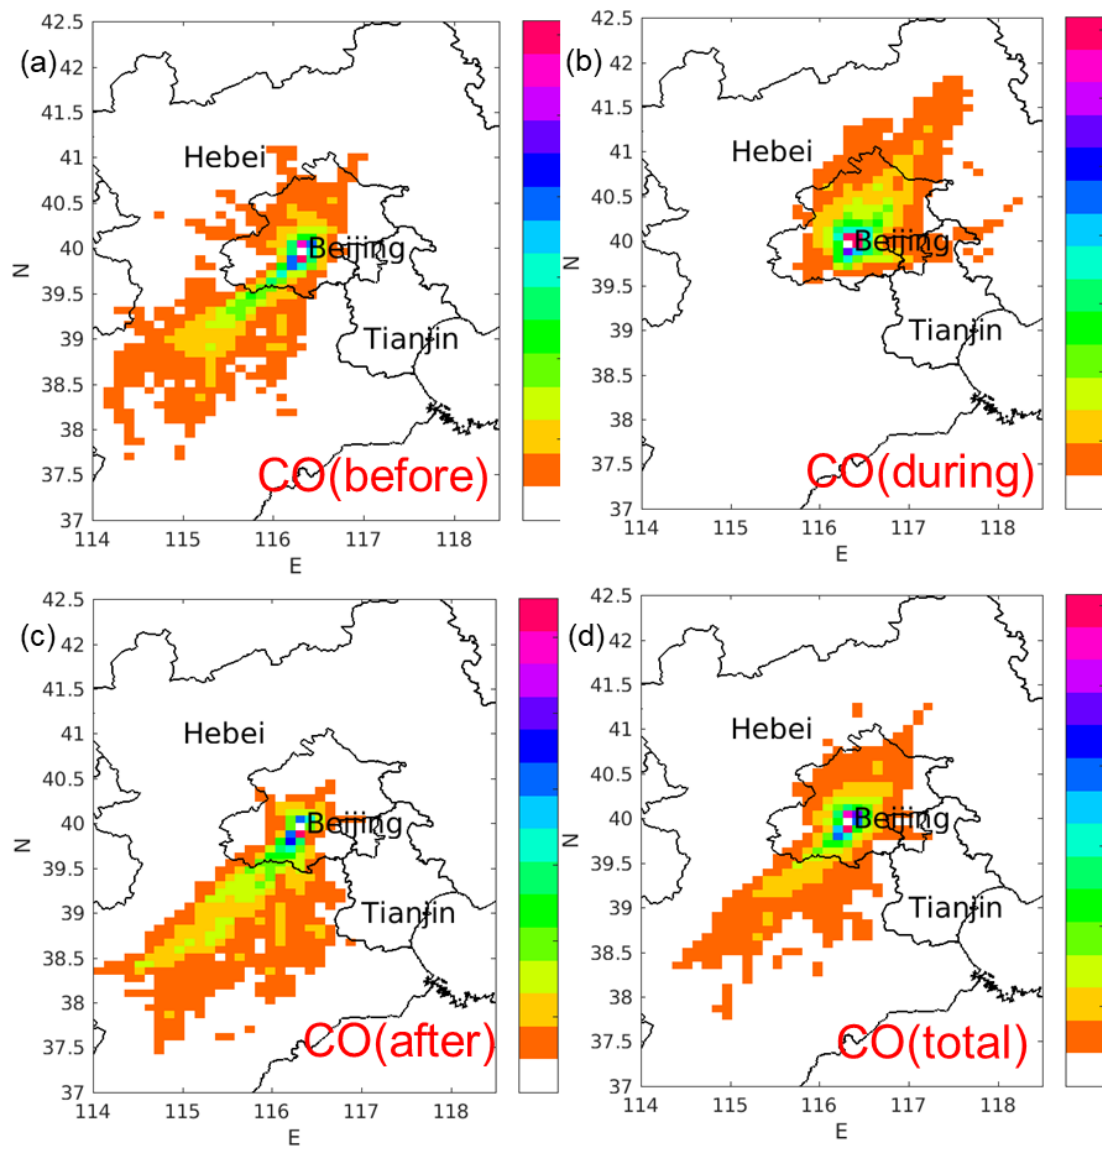

S3. Part 2

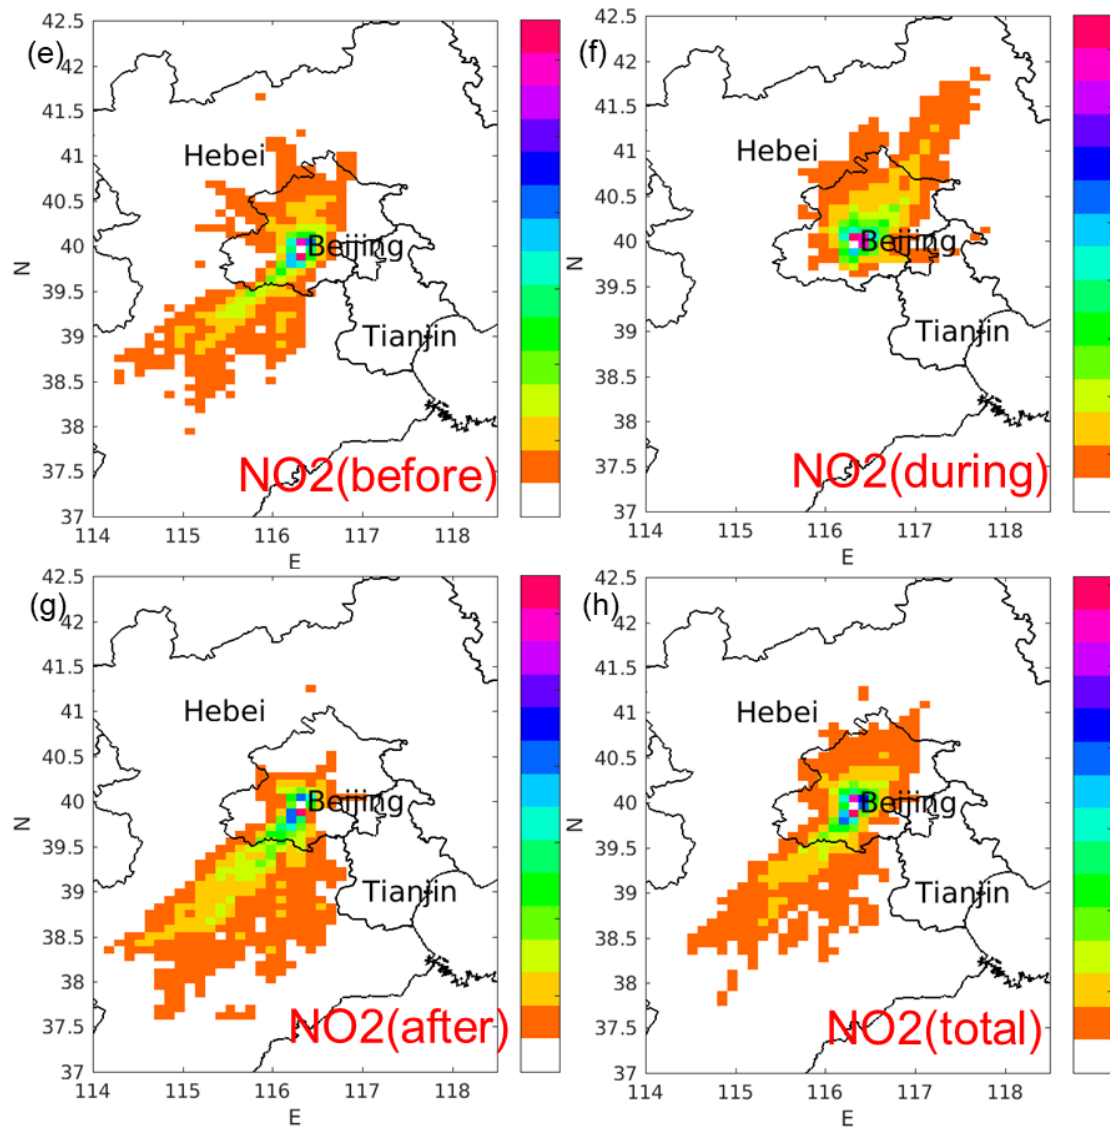

S3. Part 3

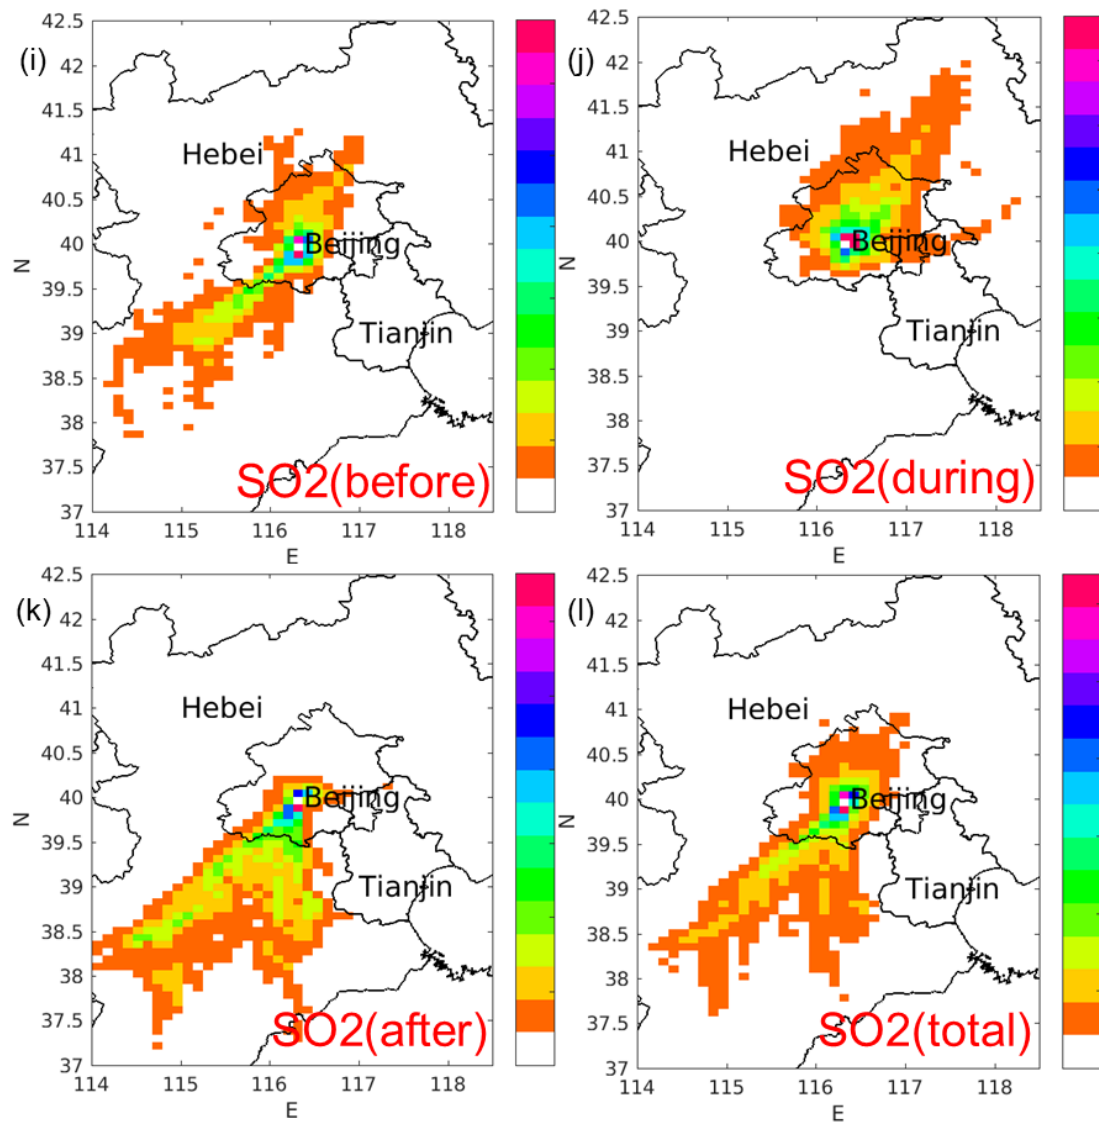

S3. The CFA results for three atmospheric pollutants, CO, NO2 and SO2. Subplots a~d, e~h, and i~l are for CO, NO2, and SO2, respectively.
