# Supplementary material for: “Military Parade Blue Skies” in Beijing: Decisive Influence of Meteorological Factors on Transport Channel and Atmospheric Pollutant Concentration Level
Source: MDPI journal article supplement (doi:10.3390/atmos12050636), 2021-05-17
Supplement: s1 [file s1 › atmosphere-1145979-supplementary/Tables.pdf]

**Table 1**

Correlation value (R) between PM<sub>2.5</sub>, SO<sub>2</sub>, CO, NO<sub>2</sub>, O<sub>3</sub>, OC and EC.

Green: R>0.8; Yellow: R<0.6; Crimson: 0.8>R>0.6

|                 |                   |      |      |      |      |      |
|-----------------|-------------------|------|------|------|------|------|
|                 | PM <sub>2.5</sub> |      |      |      |      |      |
| SO <sub>2</sub> | 0.85              |      |      |      |      |      |
| CO              | 0.88              | 0.74 |      |      |      |      |
| NO <sub>2</sub> | 0.69              | 0.80 | 0.59 |      |      |      |
| O <sub>3</sub>  | 0.66              | 0.48 | 0.52 | 0.15 |      |      |
| OC              | 0.92              | 0.86 | 0.80 | 0.70 | 0.67 |      |
| EC              | 0.90              | 0.87 | 0.85 | 0.74 | 0.57 | 0.94 |

**Table 2**

Total average concentration of aldehydes, alkanols, sterols in three time periods (ng/m<sup>3</sup>).

|        | <b>Aldehydes</b> | <b>Alkanols</b> | <b>Sterols</b> |
|--------|------------------|-----------------|----------------|
| before | 472.84           | 150.57          | 13.13          |
| during | 227.91           | 115.59          | 10.55          |
| after  | 381.19           | 158.19          | 12.47          |

**Table 3**

WRF simulation performance assessments. OM represents observation mean value. SM represents simulation mean value. R represents the Pearson correlation value. RMSE represents Root Mean Squared Error and MAE represents mean absolute error.

|      | <b>temperature</b> | <b>wind speed</b> | <b>dew point temperature</b> |
|------|--------------------|-------------------|------------------------------|
| OM   | 23.82              | 2.31              | 16.62                        |
| SM   | 28.85              | 3.67              | 8.33                         |
| R    | 0.88               | 0.47              | 0.46                         |
| RMSE | 5.36               | 2.12              | 9.01                         |
| MAE  | 5.04               | 1.58              | 8.64                         |

**Table 4**

Contribution percentage (%) of long-range transport paths. SW represents the southeast path. NE represents the northeast path. Others contains all not significant transport contribution. Local represents the transport within Beijing domain. The total column represents the whole sampling period. Only significant transport paths in CFA fields were calculated.

|                   |        | <b>total</b> | <b>before</b> | <b>during</b> | <b>after</b> |
|-------------------|--------|--------------|---------------|---------------|--------------|
| PM <sub>2.5</sub> | SW     | 52.7         | 52.57         | -             | 68.56        |
|                   | NE     | -            | -             | 60.54         | -            |
|                   | others | 34.79        | 35.69         | 18.42         | 21.79        |
|                   | local  | 12.51        | 11.74         | 21.04         | 9.65         |
| OC                | SW     | 42.39        | 43.87         | -             | 59.19        |
|                   | NE     | -            | -             | 62.66         | -            |
|                   | others | 43.47        | 40.53         | 12.56         | 29.39        |
|                   | local  | 14.14        | 15.60         | 24.78         | 11.42        |
| EC                | SW     | 44.11        | 43.01         | -             | 59.58        |
|                   | NE     | -            | -             | 54.68         | -            |
|                   | others | 40.64        | 41.11         | 20.58         | 27.35        |
|                   | local  | 15.25        | 15.88         | 24.74         | 11.07        |
